# Supplementary material
Source: ML conference proceedings conference paper supplement (https://proceedings.mlr.press/v37/pham15.html)
Supplement: Supplementary file [file pham15-supp.pdf]

---

# Multi-instance multi-label learning in the presence of novel class instances: Supplementary Material

---

## 1. Surrogate function calculation

In this section, we show the steps to compute the surrogate function. In our setting, the observed data is  $\{\mathbf{Y}_D, \mathbf{X}_D\}$ , the parameter is  $\mathbf{w}$ , and the hidden data  $\mathbf{y} = \{\mathbf{y}_1, \mathbf{y}_2, \dots, \mathbf{y}_B\}$ . To compute the surrogate  $g(\mathbf{w}, \mathbf{w}')$ , we begin with the derivation of the complete log-likelihood. We apply the conditional rule as follows

$$\begin{aligned} p(\mathbf{Y}_D, \mathbf{X}_D, \mathbf{y} | \mathbf{w}) &= p(\mathbf{Y}_D | \mathbf{y}, \mathbf{X}_D, \mathbf{w}) p(\mathbf{y} | \mathbf{X}_D, \mathbf{w}) p(\mathbf{X}_D | \mathbf{w}) \\ &= p(\mathbf{Y}_D | \mathbf{y}) \left[ \prod_{b=1}^B \prod_{i=1}^{n_b} p(y_{bi} | \mathbf{x}_{bi}, \mathbf{w}) \right] p(\mathbf{X}_D). \end{aligned} \quad (1)$$

We recall the relation between the instance label and feature vector, including novel class, as follows

$$p(y_{bi} | \mathbf{x}_{bi}, \mathbf{w}) = \frac{\prod_{c=0}^C e^{I(y_{bi}=c) \mathbf{w}_c^T \mathbf{x}_{bi}}}{\sum_{c=0}^C e^{\mathbf{w}_c^T \mathbf{x}_{bi}}}. \quad (2)$$

Then, the complete log-likelihood can be computed by taking the logarithm of (1), replacing  $p(y_{bi} | \mathbf{x}_{bi}, \mathbf{w})$  from (2) into (1), and reorganizing as follows

$$\begin{aligned} \log p(\mathbf{Y}_D, \mathbf{X}_D, \mathbf{y} | \mathbf{w}) &= \sum_{b=1}^B \sum_{i=1}^{n_b} \sum_{c=0}^C I(y_{bi} = c) \mathbf{w}_c^T \mathbf{x}_{bi} \\ &\quad - \sum_{b=1}^B \sum_{i=1}^{n_b} \log \left( \sum_{c=0}^C e^{\mathbf{w}_c^T \mathbf{x}_{bi}} \right) + \log p(\mathbf{Y}_D | \mathbf{y}) + \log p(\mathbf{X}_D). \end{aligned} \quad (3)$$

Finally, taking the expectation of (3) w.r.t.  $\mathbf{y}$  given  $\mathbf{Y}_D, \mathbf{X}_D$ , and  $\mathbf{w}'$ , we obtain the surrogate function  $g(\cdot, \cdot)$  as follows

$$\begin{aligned} g(\mathbf{w}, \mathbf{w}') &= E_{\mathbf{y}} [\log p(\mathbf{Y}_D, \mathbf{X}_D, \mathbf{y} | \mathbf{w}) | \mathbf{Y}_D, \mathbf{X}_D, \mathbf{w}'] \\ &= \sum_{b=1}^B \sum_{i=1}^{n_b} \left[ \sum_{c=0}^C p(y_{bi} = c | \mathbf{Y}_b, \mathbf{X}_b, \mathbf{w}') \mathbf{w}_c^T \mathbf{x}_{bi} \right. \\ &\quad \left. - \log \left( \sum_{c=0}^C e^{\mathbf{w}_c^T \mathbf{x}_{bi}} \right) \right] + \zeta, \end{aligned} \quad (4)$$

where  $\zeta = E_{\mathbf{y}} [\log p(\mathbf{Y}_D | \mathbf{y}) | \mathbf{Y}_D, \mathbf{X}_D, \mathbf{w}'] + \log p(\mathbf{X}_D)$  is a constant w.r.t.  $\mathbf{w}$ .

## 2. Proof for the dynamic programming equation of Step 1 in the E-step

The probability of the bag label for the first  $j+1$  instances of the  $b$ th bag can be computed recursively using

$$\begin{aligned} p(\mathbf{Y}_b^{j+1} = \mathbf{L}' | \mathbf{X}_b, \mathbf{w}) &= \sum_{l \in \mathbf{L}'} p(y_{bj+1} = l | \mathbf{x}_{bj+1}, \mathbf{w}) \\ &\quad \times [p(\mathbf{Y}_b^j = \mathbf{L}'_{\setminus l} | \mathbf{X}_b, \mathbf{w}) + p(\mathbf{Y}_b^j = \mathbf{L}' | \mathbf{X}_b, \mathbf{w})]. \end{aligned}$$

*Proof.* Assume  $\mathbf{L}'$  is the label set of the first  $j+1$  instances. If the  $(j+1)$ th instance has label  $l$ , then the label set of the first  $j$  instances would be either  $\mathbf{L}'_{\setminus l}$ , or  $\mathbf{L}'$ . In the former case, the  $(j+1)$ th instance is the only class  $l$  instance in the first  $j+1$  instances. In the second case, some instance before  $j+1$  also belongs to class  $l$ . These two cases are mutually exclusive. Following the total probability formula, we sum over all mutually exclusive events.  $\square$

## 3. Proof for Proposition 1

In this section, we show the detailed proof for Proposition 1 of computing  $p(y_{bn_b}, \mathbf{Y}_b = \mathbf{L} | \mathbf{X}_b, \mathbf{w})$  from  $p(\mathbf{Y}_b^{n_b-1} | \mathbf{X}_b, \mathbf{w})$  and  $p(y_{bn_b} = c | \mathbf{x}_{bn_b}, \mathbf{w})$ .

**Proposition 1** *The probability  $p(y_{bn_b} = c, \mathbf{Y}_b = \mathbf{L} | \mathbf{X}_b, \mathbf{w})$  for all  $c \in \mathbf{L} \cup \{0\}$  can be computed using*

- If  $c = 0$ ,

$$\begin{aligned} p(y_{bn_b} = c, \mathbf{Y}_b = \mathbf{L} | \mathbf{X}_b, \mathbf{w}) &= p(y_{bn_b} = c | \mathbf{x}_{bn_b}, \mathbf{w}) \times \\ &\quad [p(\mathbf{Y}_b^{n_b-1} = \mathbf{L} | \mathbf{X}_b, \mathbf{w}) + p(\mathbf{Y}_b^{n_b-1} = \mathbf{L} \cup \{0\} | \mathbf{X}_b, \mathbf{w})]. \end{aligned}$$

- Else if  $c \neq 0$ ,

$$\begin{aligned} p(y_{bn_b} = c, \mathbf{Y}_b = \mathbf{L} | \mathbf{X}_b, \mathbf{w}) &= p(y_{bn_b} = c | \mathbf{x}_{bn_b}, \mathbf{w}) \times \\ &\quad [p(\mathbf{Y}_b^{n_b-1} = \mathbf{L} | \mathbf{X}_b, \mathbf{w}) + p(\mathbf{Y}_b^{n_b-1} = \mathbf{L}_{\setminus c} | \mathbf{X}_b, \mathbf{w}) + \\ &\quad p(\mathbf{Y}_b^{n_b-1} = \mathbf{L} \cup \{0\} | \mathbf{X}_b, \mathbf{w}) + \\ &\quad p(\mathbf{Y}_b^{n_b-1} = \mathbf{L}_{\setminus c} \cup \{0\} | \mathbf{X}_b, \mathbf{w})]. \end{aligned}$$

*Proof.* Denote the power set of  $\mathbf{L} \cup \{0\}$  excluding the empty set as  $\mathbf{P}$ . We compute  $p(y_{bn_b} = c, \mathbf{Y}_b = \mathbf{L} | \mathbf{X}_b, \mathbf{w})$

000  
001  
002  
003  
004  
005  
006  
007  
008  
009  
010  
011  
012  
013  
014  
015  
016  
017  
018  
019  
020  
021  
022  
023  
024  
025  
026  
027  
028  
029  
030  
031  
032  
033  
034  
035  
036  
037  
038  
039  
040  
041  
042  
043  
044  
045  
046  
047  
048  
049  
050  
051  
052  
053  
054

055  
056  
057  
058  
059  
060  
061  
062  
063  
064  
065  
066  
067  
068  
069  
070  
071  
072  
073  
074  
075  
076  
077  
078  
079  
080  
081  
082  
083  
084  
085  
086  
087  
088  
089  
090  
091  
092  
093  
094  
095  
096  
097  
098  
099  
100  
101  
102  
103  
104  
105  
106  
107  
108  
109

by marginalizing  $p(y_{bn_b}, \mathbf{Y}_b = \mathbf{L}, \mathbf{Y}_b^{n_b} = \mathbf{L}' | \mathbf{X}_b, \mathbf{w})$  over  $\mathbf{Y}_b^{n_b}$  as follows

$$\begin{aligned} & p(y_{bn_b} = c, \mathbf{Y}_b = \mathbf{L} | \mathbf{X}_b, \mathbf{w}) \\ &= \sum_{\mathbf{L}' \subseteq \mathbf{P}} p(y_{bn_b} = c, \mathbf{Y}_b = \mathbf{L}, \mathbf{Y}_b^{n_b} = \mathbf{L}' | \mathbf{X}_b, \mathbf{w}). \end{aligned} \quad (5)$$

Using conditional probability rule for the right hand side of (5) we obtain

$$\begin{aligned} & p(y_{bn_b} = c, \mathbf{Y}_b = \mathbf{L} | \mathbf{X}_b, \mathbf{w}) \\ &= \sum_{\mathbf{L}' \subseteq \mathbf{P}} p(y_{bn_b} = c, \mathbf{Y}_b^{n_b} = \mathbf{L}' | \mathbf{X}_b, \mathbf{w}) p(\mathbf{Y}_b = \mathbf{L} | \mathbf{Y}_b^{n_b} = \mathbf{L}'). \end{aligned} \quad (6)$$

From the proposed model,  $p(\mathbf{Y}_b = \mathbf{L} | \mathbf{Y}_b^{n_b} = \mathbf{L}') = I(\mathbf{L} = \mathbf{L}') + I(\mathbf{L} \cup \{0\} = \mathbf{L}')$ . Replacing  $p(\mathbf{Y}_b = \mathbf{L} | \mathbf{Y}_b^{n_b} = \mathbf{L}')$  into (6) we obtain

$$\begin{aligned} & p(y_{bn_b} = c, \mathbf{Y}_b = \mathbf{L} | \mathbf{X}_b, \mathbf{w}) = p(y_{bn_b} = c, \mathbf{Y}_b^{n_b} = \mathbf{L} | \mathbf{X}_b, \mathbf{w}) \\ & \quad + p(y_{bn_b} = c, \mathbf{Y}_b^{n_b} = \mathbf{L} \cup \{0\} | \mathbf{X}_b, \mathbf{w}). \end{aligned} \quad (7)$$

• For  $c \neq 0$ : The first term in the right hand side of (7),  $p(y_{bn_b} = c, \mathbf{Y}_b^{n_b} = \mathbf{L} | \mathbf{X}_b, \mathbf{w})$ , is computed by marginalizing  $p(y_{bn_b} = c, \mathbf{Y}_b^{n_b} = \mathbf{L}, \mathbf{Y}_b^{n_b-1} = \mathbf{L}' | \mathbf{X}_b, \mathbf{w})$  over  $\mathbf{Y}_b^{n_b-1}$  as follows

$$\begin{aligned} & p(y_{bn_b} = c, \mathbf{Y}_b^{n_b} = \mathbf{L} | \mathbf{X}_b, \mathbf{w}) \\ &= \sum_{\mathbf{L}' \subseteq \mathbf{P}} p(y_{bn_b} = c, \mathbf{Y}_b^{n_b} = \mathbf{L}, \mathbf{Y}_b^{n_b-1} = \mathbf{L}' | \mathbf{X}_b, \mathbf{w}). \end{aligned} \quad (8)$$

Using the conditional probability rule we have

$$\begin{aligned} & p(y_{bn_b} = c, \mathbf{Y}_b^{n_b} = \mathbf{L}, \mathbf{Y}_b^{n_b-1} = \mathbf{L}' | \mathbf{X}_b, \mathbf{w}) \\ &= p(y_{bn_b} = c, \mathbf{Y}_b^{n_b-1} = \mathbf{L}' | \mathbf{X}_b, \mathbf{w}) \times \\ & \quad p(\mathbf{Y}_b^{n_b} = \mathbf{L} | y_{bn_b} = c, \mathbf{Y}_b^{n_b-1} = \mathbf{L}'). \end{aligned} \quad (9)$$

Replacing  $p(y_{bn_b} = c, \mathbf{Y}_b^{n_b} = \mathbf{L}, \mathbf{Y}_b^{n_b-1} = \mathbf{L}' | \mathbf{X}_b, \mathbf{w})$  into (8) we obtain

$$\begin{aligned} & p(y_{bn_b} = c, \mathbf{Y}_b^{n_b} = \mathbf{L} | \mathbf{X}_b, \mathbf{w}) \\ &= \sum_{\mathbf{L}' \subseteq \mathbf{P}} [p(y_{bn_b} = c, \mathbf{Y}_b^{n_b-1} = \mathbf{L}' | \mathbf{X}_b, \mathbf{w}) \times \\ & \quad p(\mathbf{Y}_b^{n_b} = \mathbf{L} | y_{bn_b} = c, \mathbf{Y}_b^{n_b-1} = \mathbf{L}')]. \end{aligned} \quad (10)$$

From the proposed model we have  $p(\mathbf{Y}_b^{n_b} = \mathbf{L} | y_{bn_b} = c, \mathbf{Y}_b^{n_b-1} = \mathbf{L}') = I(\mathbf{L} = \mathbf{L}' \cup \{c\})$ . Moreover, given instance features, instance labels are independent. Consequently, from (10), we obtain

$$\begin{aligned} & p(y_{bn_b} = c, \mathbf{Y}_b^{n_b} = \mathbf{L} | \mathbf{X}_b, \mathbf{w}) \\ &= \sum_{\mathbf{L}' \subseteq \mathbf{P}} [p(y_{bn_b} = c | \mathbf{x}_{bn_b}, \mathbf{w}) \times \\ & \quad p(\mathbf{Y}_b^{n_b-1} = \mathbf{L}' | \mathbf{X}_b, \mathbf{w}) I(\mathbf{L} = \mathbf{L}' \cup \{c\})] \\ &= p(y_{bn_b} = c | \mathbf{x}_{bn_b}, \mathbf{w}) \times \\ & \quad [p(\mathbf{Y}_b^{n_b-1} = \mathbf{L} | \mathbf{X}_b, \mathbf{w}) + p(\mathbf{Y}_b^{n_b-1} = \mathbf{L}_{\setminus c} | \mathbf{X}_b, \mathbf{w})]. \end{aligned} \quad (11)$$

Deriving similar steps from (8) to (11) for the second term of (7),  $p(y_{bn_b} = c, \mathbf{Y}_b^{n_b} = \mathbf{L} \cup \{0\} | \mathbf{X}_b, \mathbf{w})$ , we obtain

$$\begin{aligned} & p(y_{bn_b} = c, \mathbf{Y}_b^{n_b} = \mathbf{L} \cup \{0\} | \mathbf{X}_b, \mathbf{w}) \\ &= p(y_{bn_b} = c | \mathbf{x}_{bn_b}, \mathbf{w}) \times \\ & \quad [p(\mathbf{Y}_b^{n_b-1} = \mathbf{L} \cup \{0\} | \mathbf{X}_b, \mathbf{w}) + p(\mathbf{Y}_b^{n_b-1} = \mathbf{L}_{\setminus c} \cup \{0\} | \mathbf{X}_b, \mathbf{w})]. \end{aligned} \quad (12)$$

Replacing probabilities obtained in (11) and (12) into (7), we obtain the proof for the case  $c \neq 0$ .

• For  $c = 0$ : Since the bag label  $\mathbf{L}$  does not contain novel label 0 and  $y_{bn_b} \in \mathbf{Y}_b^{n_b}$ , the first term in the right hand side of (7),  $p(y_{bn_b} = c, \mathbf{Y}_b^{n_b} = \mathbf{L} | \mathbf{X}_b, \mathbf{w}) = 0$ . Replacing probabilities obtained in (12) into (7), we obtain the proof for the case  $c = 0$ .  $\square$

#### 4. Instance membership probability calculation algorithm

In this section, we show the pseudo code for computing  $p(y_{bi} = c, \mathbf{Y}_b = \mathbf{L} | \mathbf{X}_b, \mathbf{w})$ .

---

**Algorithm 1** Instance membership probability calculation algorithm

---

**Input:**  $\mathbf{L}, \mathbf{X}_b, \mathbf{Y}_b, \mathbf{w}, c$

---

**Output:**  $p(y_{bi} = c, \mathbf{Y}_b = \mathbf{L} | \mathbf{X}_b, \mathbf{w}), \forall 1 \leq i \leq n_b$

---

**for**  $i = 1$  to  $n_b$  **do**

    Swap  $y_{bi}$  and  $y_{bn_b}$ .

    Initialize  $p(\mathbf{Y}_b^1 = \mathbf{L} | \mathbf{X}_b, \mathbf{w}) = 0, \forall \mathbf{L} \subseteq \mathbf{P}$ .

    Set  $p(\mathbf{Y}_b^1 = \{l\} | \mathbf{X}_b, \mathbf{w}) = p(y_{b1} = l | \mathbf{x}_{b1}, \mathbf{w}), \forall l \in \mathbf{L} \cup \{0\}$ .

**for**  $j = 1$  to  $n_b - 1$  **do**

        Dynamically compute  $p(\mathbf{Y}_b^{j+1} | \mathbf{X}_b, \mathbf{w})$ , from  $p(\mathbf{Y}_b^j | \mathbf{X}_b, \mathbf{w})$  using (8).

**end for**

    Compute  $p(y_{bi} = c, \mathbf{Y}_b = \mathbf{L} | \mathbf{X}_b, \mathbf{w})$  from  $p(\mathbf{Y}_b^i | \mathbf{X}_b, \mathbf{w})$  using Proposition 1.

    Swap back  $y_{bi}$  and  $y_{bn_b}$ .

**end for**

---

165  
166  
167  
168  
169  
170  
171  
172  
173  
174  
175  
176  
177  
178  
179  
180  
181  
182  
183  
184  
185  
186  
187  
188  
189  
190  
191  
192  
193  
194  
195  
196  
197  
198  
199  
200  
201  
202  
203  
204  
205  
206  
207  
208  
209  
210  
211  
212  
213  
214  
215  
216  
217  
218  
219
